# Supplementary material for: Effects of activated charcoal-herb extractum complex on the growth performance, immunological indices, intestinal morphology and microflora in weaning piglets
Source: PubMed Central journal article supplement — RSC Adv. 2019 Feb 18;9(11):5948–57. doi: 10.1039/c8ra10283j (PMC9060878; doi:10.1039/c8ra10283j), 2019-02-18
Supplement: RA-009-C8RA10283J-s001.pdf [file RA-009-C8RA10283J-s001.pdf]

**Supplement Table 1** Comparison of the surface area, pore volume and pore size between MMT  
and CHC

| <b>Items</b>                                      | <b>MMT</b> | <b>CHC</b> |
|---------------------------------------------------|------------|------------|
| <b>Surface Area (m<sup>2</sup>/g)</b>             |            |            |
| Single point surface area                         | 39.23      | 1313.40    |
| BET surface area                                  | 40.71      | 1440.09    |
| Langmuir surface area                             | 54.16      | 1692.65    |
| T-plot micropore area                             | 0          | 991.87     |
| T-plot external surface area                      | 40.71      | 448.22     |
| BJH adsorption cumulative surface area            | 42.45      | 457.52     |
| BJH desorption cumulative surface area            | 59.68      | 473.19     |
| <b>Pore Volume (cm<sup>3</sup>/g)</b>             |            |            |
| Single point adsorption total pore volume         | 0.18       | 1.28       |
| T-plot micropore volume                           | 0          | 0.42       |
| BJH adsorption cumulative volume                  | 0.18       | 0.87       |
| BJH desorption cumulative volume                  | 0.18       | 0.87       |
| <b>Pore Size (nm)</b>                             |            |            |
| Total adsorption average pore width (4V/A by BET) | 17.23      | 3.56       |
| BJH adsorption average pore width (4V/A)          | 16.94      | 7.64       |
| BJH desorption average pore width (4V/A)          | 12.05      | 7.39       |
| BJH median pore width                             | 2.23       | 2.04       |

**Supplement Figure 1** Elemental analysis for CHC

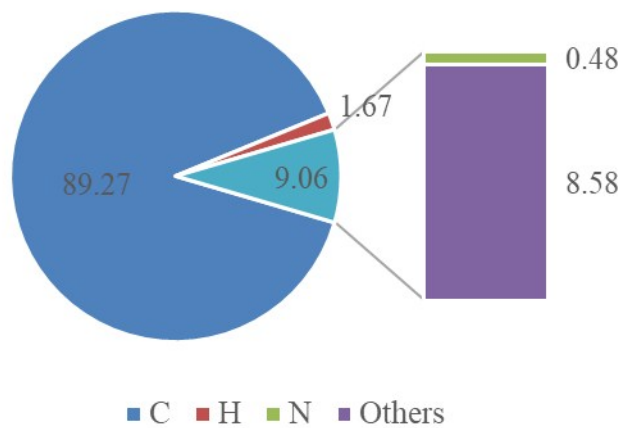

**Supplement figure 1** Elemental analysis of CH
